# Supplementary material for: Preparation of high-strength and lightweight microcellular polysulfone foam with a segregated CNT network for excellent electromagnetic shielding
Source: Royal Society of Chemistry journal article supplement (doi:10.1039/d0ra00942c), 2020-01-01
Supplement: d0ra00942c1.pdf [file d0ra00942c1.pdf]

Supporting Information

**Preparation of High-strength and Lightweight Microcellular Polysulfone Foam  
with Segregated CNTs Network for Excellent Electromagnetic Shielding**

Yeping Xie<sup>a</sup>, Fan Ye<sup>a</sup>, Wenhua Chen<sup>b, c</sup>, Jiahong Tang<sup>a</sup>, Pengju Liu<sup>a\*</sup>

a State Key Laboratory of Polymer Materials Engineering, Polymer Research Institute  
of Sichuan University, Chengdu, 610065, China

b College of Architecture and Environment, Sichuan University, Chengdu, 610065,  
China

c National Engineering Research Centre for Flue Gas Desulfurization, Chengdu,  
610065, China

\* Corresponding author, E-mail: sculpj@163.com (PJ Liu)

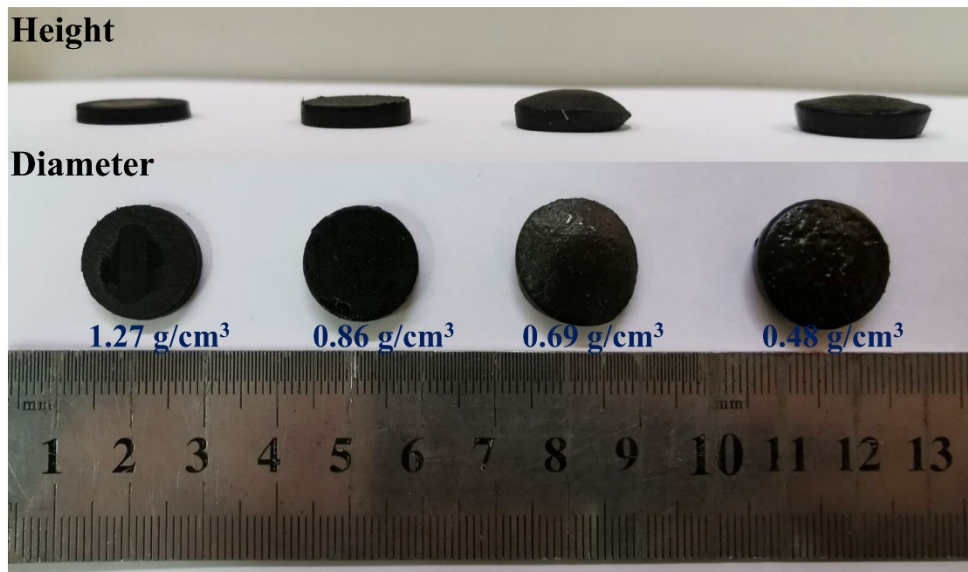

**Fig. S1** Digital photo showing the samples before and after foaming.

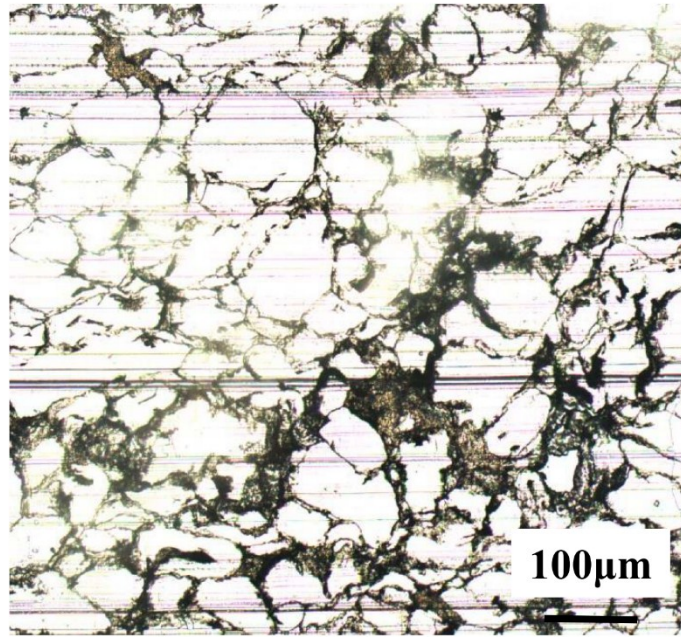

**Fig. S2** OM image of the s-PC-0.5 slice.

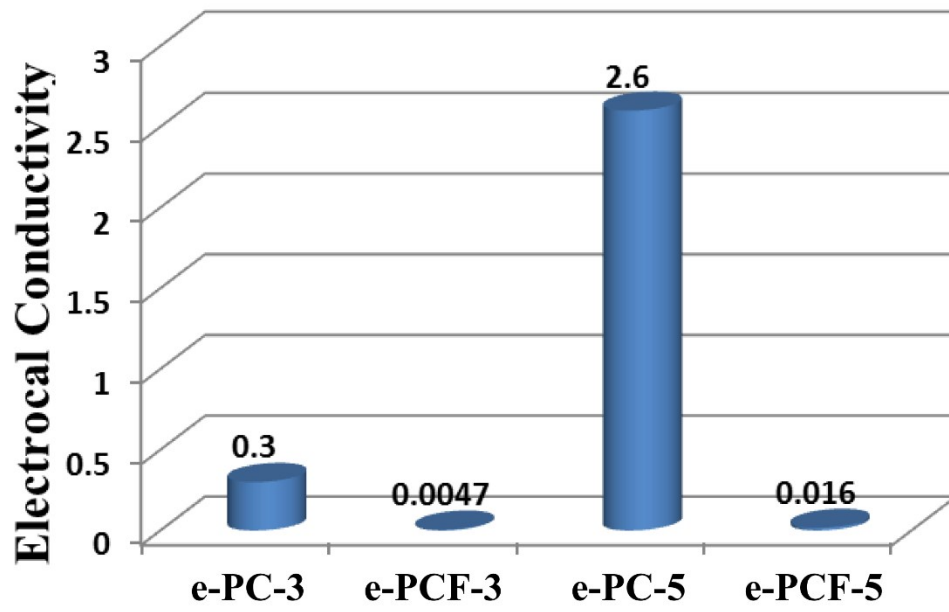

**Fig. S3** Electrical conductivity versus CNTs loading for the PSU/CNTs composites and their foams with randomly distributed CNTs.

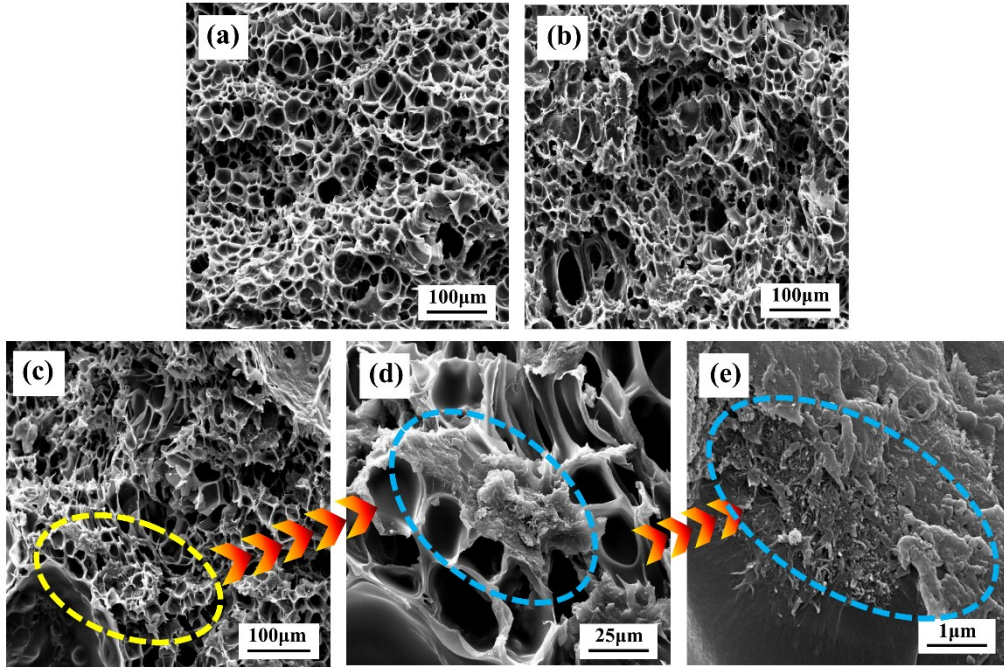

**Fig. S4** SEM images of s-PCF with density of  $0.48 \text{ g/cm}^3$  (a) s-PCF-1; (b) s-PCF-3; (c) s-PCF-5; (d) magnified SEM image of (c); (e) magnified SEM image of (d).

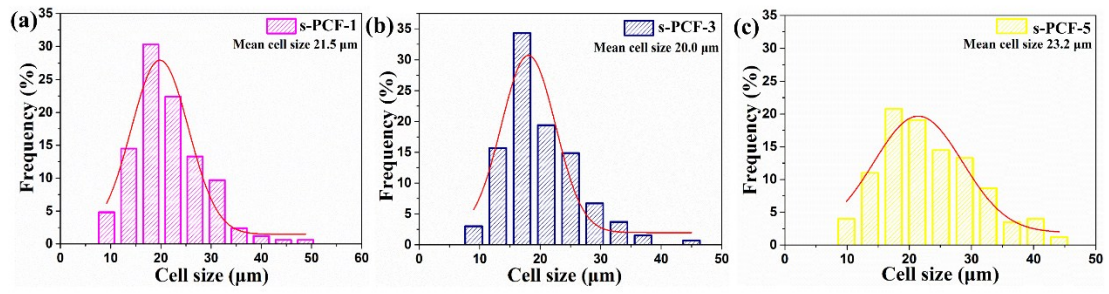

**Fig. S5** Cell size distribution of PSU/CNTs composite foams prepared at the same condition (density of 0.48 g/cm<sup>3</sup>): (a) s-PCF-1; (b) s-PCF-3; (c) s-PCF-5.
